# Supplementary material for: Identification of Predictive Factors for Overall Survival and Response during Hypomethylating Treatment in Very Elderly (≥75 Years) Acute Myeloid Leukemia Patients: A Multicenter Real-Life Experience
Source: MDPI journal article supplement (doi:10.3390/cancers14194897), 2022-10-06
Supplement: s1 [file s1]

**Supplemental Table S1. Univariate Logistic Regression Models for Response (CR)**

| Variable                                           | Predictive Factor |                   |
|----------------------------------------------------|-------------------|-------------------|
|                                                    | p value           | OR (95% CI)       |
| <b>Age at diagnosis</b>                            |                   |                   |
| (75-80 years vs $\geq 80$ )                        | 0.006             | 2.99 (1.37-6.53)  |
| <b>Sex</b>                                         |                   |                   |
| (female vs male)                                   | 0.408             | 1.30 (0.70-2.44)  |
| <b>ECOG PS</b>                                     |                   |                   |
| (<2 vs $\geq 2$ )                                  | 0.034             | 2.15 (1.06-4.27)  |
| <b>Type of AML</b>                                 |                   |                   |
| (s-AML vs de novo AML)                             | 0.005             | 0.35 (0.17-0.74)  |
| <b>eGFR</b>                                        |                   |                   |
| (<60 vs $\geq 60$ ml/min/1.73m <sup>2</sup> )      | 0.013             | 0.16 (0.04-0.67)  |
| <b>CCI</b>                                         |                   |                   |
| (<3 vs $\geq 3$ )                                  | <0.001            | 6.62 (3.22-13.62) |
| <b>BMI at diagnosis</b>                            |                   |                   |
| (<25 vs $\geq 25$ )                                | 0.018             | 2.26 (1.15-4.44)  |
| <b>BM blast percentage</b>                         |                   |                   |
| ( $\geq 50\%$ vs <50%)                             | <0.001            | 2.18 (1.59-2.98)  |
| <b>Infectious at AML diagnosis</b>                 |                   |                   |
| (no vs yes)                                        | 0.045             | 2.56 (1.02-6.42)  |
| <b>Time from diagnosis to the start of therapy</b> |                   |                   |
| (<15 days vs 15—30 days)                           | 0.639             | 0.84 (0.40-1.75)  |
| (<15 days vs >30 days)                             | 0.237             | 0.79 (0.53-1.12)  |
| (15—30 days vs >30 days)                           | 0.120             | 0.52 (0.23-1.19)  |
| <b>Transfusion dependency at diagnosis</b>         |                   |                   |
| (yes vs no)                                        | 0.050             | 0.53 (0.28-0.99)  |
| <b>Complex Karyotype</b>                           |                   |                   |
| (yes vs no)                                        | 0.014             | 0.26 (0.09-0.75)  |
| <b>ELN risk category</b>                           |                   |                   |
| Adverse risk vs low-intermediate risk              | 0.007             | 0.78 (0.18-0.77)  |
| <b>Type of HMA</b>                                 |                   |                   |
| (AZA vs DEC)                                       | 0.143             | 0.60 (0.30-1.19)  |

**Starting HMA dose**

|                       |       |                  |
|-----------------------|-------|------------------|
| (reduced vs standard) | 0.476 | 0.46 (0.06-3.85) |
|-----------------------|-------|------------------|

**Treatment-related complication**

|             |       |                  |
|-------------|-------|------------------|
| (yes vs no) | 0.721 | 0.68 (0.08-5.74) |
|-------------|-------|------------------|

Abbreviation: AML, acute myeloid leukemia; AZA, azacitidine; BM, bone marrow; BMI, body mass index; CCI, Charlson comorbidity index; CI, confidence interval; DEC, decitabine; ECOG PS, Eastern Cooperative Oncology Group Performance Status; eGFR, estimated glomerular filtration rate; ELN, European Leukemia Net; HMA, hypomethylating agents; OR, odds ratio; s-AML, secondary AML

**Supplemental Table S2. Univariate Cox Proportional Hazards Models for Overall Survival**

| Variable                                | Predictive Factor |                  |
|-----------------------------------------|-------------------|------------------|
|                                         | p value           | HR (95% CI)      |
| <b>Age at diagnosis</b>                 |                   |                  |
| (≥80 vs 75-80 years)                    | 0.002             | 1.66 (1.21-2.30) |
| <b>Sex</b>                              |                   |                  |
| (female vs male)                        | 0.953             | 0.95 (0.71-1.28) |
| <b>ECOG PS</b>                          |                   |                  |
| (≥2 vs <2)                              | 0.009             | 1.64 (1.13-2.38) |
| <b>Type of AML</b>                      |                   |                  |
| (s-AML vs de novo AML)                  | 0.207             | 1.21 (0.89-1.64) |
| <b>eGFR</b>                             |                   |                  |
| (<30 vs ≥60 ml/min/1.73m <sup>2</sup> ) | 0.126             | 1.38 (0.92-2.01) |
| <b>CCI</b>                              |                   |                  |
| (≥3 vs <3)                              | 0.030             | 1.52 (1.04-2.33) |
| <b>BMI at diagnosis</b>                 |                   |                  |
| (<25 vs ≥25)                            | 0.121             | 0.79 (0.59-1.06) |
| <b>BM blast percentage</b>              |                   |                  |
| (≥50% vs <50%)                          | <0.001            | 1.97 (1.44-2.72) |

**Infectious at AML diagnosis**

|             |       |                  |
|-------------|-------|------------------|
| (no vs yes) | 0.204 | 0.79 (0.55-1.14) |
|-------------|-------|------------------|

**Time from diagnosis to the start of therapy**

|                          |       |                  |
|--------------------------|-------|------------------|
| (<15 days vs 15—30 days) | 0.167 | 1.29 (0.89-1.85) |
|--------------------------|-------|------------------|

|                        |       |                  |
|------------------------|-------|------------------|
| (<15 days vs >30 days) | 0.530 | 0.94 (0.79-1.13) |
|------------------------|-------|------------------|

|                          |       |                  |
|--------------------------|-------|------------------|
| (15—30 days vs >30 days) | 0.628 | 1.11 (0.75-1.63) |
|--------------------------|-------|------------------|

**Transfusion dependency at diagnosis**

|             |       |                  |
|-------------|-------|------------------|
| (yes vs no) | 0.139 | 1.26 (0.93-1.71) |
|-------------|-------|------------------|

**Complex Karyotype**

|             |        |                  |
|-------------|--------|------------------|
| (yes vs no) | <0.001 | 2.30 (1.61-3.33) |
|-------------|--------|------------------|

**ELN risk category**

|                                       |        |                  |
|---------------------------------------|--------|------------------|
| Adverse risk vs low-intermediate risk | <0.001 | 1.78 (1.32-2.42) |
|---------------------------------------|--------|------------------|

**Type of HMA**

|              |       |                  |
|--------------|-------|------------------|
| (AZA vs DEC) | 0.810 | 1.04 (0.74-1.15) |
|--------------|-------|------------------|

**Starting HMA dose**

|                       |       |                  |
|-----------------------|-------|------------------|
| (reduced vs standard) | 0.437 | 1.38 (0.61-3.12) |
|-----------------------|-------|------------------|

**BM blast percentage after 4<sup>th</sup> cycle**

|                |       |                  |
|----------------|-------|------------------|
| (≥30% vs <30%) | 0.036 | 1.61 (1.03-2.51) |
|----------------|-------|------------------|

**Type of response after 4<sup>th</sup> cycle**

|                       |        |                  |
|-----------------------|--------|------------------|
| (≥PR vs less than PR) | <0.001 | 0.50 (0.31-0.70) |
|-----------------------|--------|------------------|

**Type of best response**

|                       |        |                  |
|-----------------------|--------|------------------|
| (≥PR vs less than PR) | <0.001 | 0.18 (0.08-0.37) |
|-----------------------|--------|------------------|

**Transfusion Independence**

|             |        |                  |
|-------------|--------|------------------|
| (yes vs no) | <0.001 | 0.39 (0.28-0.59) |
|-------------|--------|------------------|

**Treatment-related complication**

|             |       |                  |
|-------------|-------|------------------|
| (yes vs no) | 0.700 | 1.15 (0.56-2.36) |
|-------------|-------|------------------|

Abbreviation: AML, acute myeloid leukemia; AZA, azacitidine; BM, bone marrow; BMI, body mass index; CCI, Charlson comorbidity index; CI, confidence interval; DEC, decitabine; ECOG PS, Eastern Cooperative Oncology Group Performance Status; eGFR, estimated glomerular filtration rate; ELN, European Leukemia Net; HMA, hypomethylating agents; HR= hazard ratio; OS, Overall Survival; PR, partial remission; s-AML, secondary AML

**Supplemental Table S3. Univariate Cox Proportional Hazards Models for Event-free Survival**

| Variable                                           | Predictive Factor |                  |
|----------------------------------------------------|-------------------|------------------|
|                                                    | p value           | HR (95% CI)      |
| <b>Age at diagnosis</b>                            |                   |                  |
| (≥80 vs 75-80 years)                               | 0.003             | 1.61 (1.18-2.21) |
| <b>Sex</b>                                         |                   |                  |
| (female vs male)                                   | 0.553             | 0.92 (0.68-1.22) |
| <b>ECOG PS</b>                                     |                   |                  |
| (≥2 vs <2)                                         | 0.053             | 1.42 (0.99-2.03) |
| <b>Type of AML</b>                                 |                   |                  |
| (s-AML vs de novo AML)                             | 0.005             | 1.53 (1.13-2.05) |
| <b>eGFR</b>                                        |                   |                  |
| (<30 vs ≥30 ml/min/1.73m <sup>2</sup> )            | 0.198             | 1.30 (0.87-1.93) |
| <b>CCI</b>                                         |                   |                  |
| (≥3 vs <3)                                         | 0.007             | 1.67 (1.17-2.45) |
| <b>BMI at diagnosis</b>                            |                   |                  |
| (<25 vs ≥25)                                       | 0.631             | 0.93 (0.70-1.25) |
| <b>BM blast percentage</b>                         |                   |                  |
| (≥50% vs <50%)                                     | <0.001            | 2.18 (1.59-2.98) |
| <b>Infectious at AML diagnosis</b>                 |                   |                  |
| (no vs yes)                                        | 0.128             | 0.76 (0.54-1.08) |
| <b>Time from diagnosis to the start of therapy</b> |                   |                  |
| (<15 days vs 15—30 days)                           | 0.102             | 1.35 (0.94-1.94) |
| (<15 days vs >30 days)                             | 0.759             | 0.97 (0.82-1.15) |
| (15—30 days vs >30 days)                           | 0.251             | 0.80 (0.55-1.17) |
| <b>Transfusion dependency at diagnosis</b>         |                   |                  |
| (yes vs no)                                        | 0.393             | 1.14 (0.85-1.54) |
| <b>Complex Karyotype</b>                           |                   |                  |
| (yes vs no)                                        | <0.001            | 2.39 (1.66-3.42) |
| <b>ELN risk category</b>                           |                   |                  |
| Adverse risk vs low-intermediate risk              | <0.001            | 1.93 (1.44-2.59) |
| <b>Type of HMA</b>                                 |                   |                  |
| (AZA vs DEC)                                       | 0.947             | 0.98 (0.71-1.37) |

**Starting HMA dose**

|                       |       |                  |
|-----------------------|-------|------------------|
| (reduced vs standard) | 0.593 | 1.23 (0.57-2.63) |
|-----------------------|-------|------------------|

**BM blast percentage after 4<sup>th</sup> cycle**

|                |       |                  |
|----------------|-------|------------------|
| (≥30% vs <30%) | 0.071 | 1.50 (0.97-2.32) |
|----------------|-------|------------------|

**Type of response after 4<sup>th</sup> cycle**

|                       |       |                  |
|-----------------------|-------|------------------|
| (≥PR vs less than PR) | 0.003 | 0.55 (0.36-0.82) |
|-----------------------|-------|------------------|

**Type of best response**

|          |       |                  |
|----------|-------|------------------|
| CR vs PR | 0.027 | 0.51 (0.28-0.93) |
|----------|-------|------------------|

|          |        |                  |
|----------|--------|------------------|
| CR vs SD | <0.001 | 0.37 (0.23-0.59) |
|----------|--------|------------------|

|          |       |                  |
|----------|-------|------------------|
| PR vs SD | 0.141 | 0.65 (0.37-1.15) |
|----------|-------|------------------|

**Transfusion Independence**

|             |        |                  |
|-------------|--------|------------------|
| (yes vs no) | <0.001 | 0.16 (0.10-0.33) |
|-------------|--------|------------------|

**Treatment-related complication**

|             |       |                  |
|-------------|-------|------------------|
| (yes vs no) | 0.870 | 1.06 (0.52-2.18) |
|-------------|-------|------------------|

Abbreviation: AML, acute myeloid leukemia; AZA, azacitidine; BM, bone marrow; BMI, body mass index; CCI, Charlson comorbidity index; CI, confidence interval; CR, complete remission; DEC, decitabine; ECOG PS, Eastern Cooperative Oncology Group Performance Status; eGFR, estimated glomerular filtration rate; ELN, European Leukemia Net; HMA, hypomethylating agents; HR= hazard ratio; OS, Overall Survival; PR, partial remission; s-AML, secondary AML
